# Supplementary material for: Cost-Effectiveness of Vaccination of Older Adults with an MF59®-Adjuvanted Quadrivalent Influenza Vaccine Compared to Standard-Dose and High-Dose Vaccines in Denmark, Norway, and Sweden
Source: MDPI journal article supplement (doi:10.3390/vaccines11040753), 2023-03-29
Supplement: s1 [file s1]

# Supplementary materials

## *List of tables*

Table S1. Clinical, societal, and utility loss inputs for IRCs

Table S2. Hospitalization and outpatient treatment costs for IRCs

Table S3. Scenario analysis results (aQIV vs. SD-QIV) – Societal perspective

Table S4. Scenario analysis results (aQIV vs. HD-QIV) – Healthcare payer perspective

Table S5. Scenario analysis results (aQIV vs. HD-QIV) - Societal perspective

## *List of figures*

Figure S1. DSA results (aQIV vs. SD-QIV) – Societal perspective: (A) Denmark, (B) Norway, (C) Sweden

Figure S2. PSA results (aQIV vs. SD-QIV) – Societal perspective: (A) Denmark, (B) Norway, and (C) Sweden

Figure S3. DSA results (aQIV vs. HD-QIV) – Healthcare payer perspective: (A) Denmark, (B) Norway, (C) Sweden

Figure S4. PSA results (aQIV vs. HD-QIV) – Healthcare payer perspective: (A) Denmark, (B) Norway, and (C) Sweden

Figure S5. DSA results (aQIV vs. HD-QIV) – Societal perspective: (A) Denmark, (B) Norway, (C) Sweden

Figure S6. PSA results (aQIV vs. HD-QIV) – Societal perspective: (A) Denmark, (B) Norway, and (C) Sweden

**Table S1.** Clinical, societal, and utility loss inputs for IRCs.

| Parameter                                  | Value <sup>a</sup> | Reference                   |
|--------------------------------------------|--------------------|-----------------------------|
| Clinical events                            |                    |                             |
| Probability of developing IRCs             |                    |                             |
| Bronchitis                                 | 3.85%              | [1]                         |
| Pneumonia                                  | 1.46%              |                             |
| URTI                                       | 6.05%              |                             |
| Myocarditis                                | 0.89%              |                             |
| Renal complications                        | 0.18%              |                             |
| CNS complications                          | 0.35%              |                             |
| GI bleeding                                | 0.81%              |                             |
| MI                                         | 0.13%              |                             |
| Stroke                                     |                    | [2,3]                       |
| Age 65–74 years                            | 0.75%              |                             |
| Age 75+ years                              | 1.79%              |                             |
| HF                                         | 0.89%              | Assumed same as myocarditis |
| Probability of hospitalization due to IRCs |                    |                             |
| Bronchitis                                 | 1.00%              | [4]                         |
| Pneumonia                                  |                    | [5]                         |
| Age 65–74 years                            | 75.40%             |                             |
| Age 75+ years                              | 83.70%             |                             |
| URTI                                       | 1.00%              | Assumed same as bronchitis  |
| Myocarditis                                |                    | Assumed same as pneumonia   |
| Age 65–74 years                            | 75.40%             |                             |
| Age 75+ years                              | 83.70              |                             |
| Renal complications                        | 100.00%            | Assumption                  |
| CNS complications                          | 100.00%            | Assumption                  |
| GI bleeding                                | 75.90%             | [6]                         |
| MI                                         | 100.00%            | Assumption                  |
| Stroke                                     | 86.00%             | [7]                         |
| HF                                         |                    | Assumed same as myocarditis |
| Age 65–74 years                            | 75.40%             |                             |
| Age 75+ years                              | 83.70%             |                             |
| Probability of death due to IRCs           |                    |                             |
| Bronchitis                                 | 0.03%              | [1]                         |
| Pneumonia                                  | 6.90%              |                             |
| URTI                                       | 0.03%              |                             |
| Myocarditis                                | 20.80%             | [8]                         |
| Renal complications                        |                    | [1]                         |
| Age 65–74 years                            | 14.15%             |                             |
| Age 75+ years                              | 28.40%             |                             |
| CNS complications                          | 2.90%              | [1]                         |
| GI bleeding                                | 3.00%              |                             |
| MI                                         |                    |                             |
| Age 65–74 years                            | 11.90%             | [1]                         |
| Age 75+ years                              | 22.33%             |                             |
| Stroke                                     | 28.20%             | [9]                         |
| HF                                         |                    | [10]                        |
| Age 65–74 years                            | 11.80%             |                             |
| Age 75+ years                              | 16.70%             |                             |
| Societal perspective inputs                |                    |                             |

### Number of days lost due to hospitalization

|                     |       |                             |
|---------------------|-------|-----------------------------|
| Bronchitis          | 3.20  | [11]                        |
| Pneumonia           | 10.00 | [12]                        |
| URTI                | 5.40  | [13]                        |
| Myocarditis         | 36.00 | [14]                        |
| Renal complications | 10.80 | [15]                        |
| CNS complications   | 7.60  | [16]                        |
| GI bleeding         | 4.00  | [17]                        |
| MI                  | 44.00 | [18]                        |
| Stroke              | 34.00 | [14]                        |
| HF                  | 36.00 | Assumed same as myocarditis |

### Utility decrements

#### Hospitalization

|                     |         |                             |
|---------------------|---------|-----------------------------|
| Bronchitis          | -0.0090 |                             |
| Pneumonia           | -0.0116 |                             |
| URTI                | -0.0073 |                             |
| Myocarditis         | -0.0085 |                             |
| Renal complications | -0.0120 | [1]                         |
| CNS complications   | -0.0088 |                             |
| GI bleeding         | -0.0054 |                             |
| MI                  | -0.1980 |                             |
| Stroke              | -0.2870 |                             |
| HF                  | -0.0085 | Assumed same as myocarditis |

#### Outpatient

|                     |         |     |
|---------------------|---------|-----|
| Bronchitis          | -0.0046 |     |
| Pneumonia           | -0.0063 |     |
| URTI                | -0.0021 |     |
| Myocarditis         | -0.0025 |     |
| Renal complications | -0.0050 |     |
| CNS complications   | -0.0046 | [1] |
| GI bleeding         | -0.0014 |     |
| MI                  | -0.1980 |     |
| Stroke              | -0.2870 |     |
| HF                  | -0.0025 |     |

CNS: Central nervous system; HF: Heart failure; IRCs: Influenza-related complications; MI: Myocardial infarction; URTI: Upper respiratory tract infection.

**Table S2.** Hospitalization and outpatient treatment costs for IRCs.

| Parameter                       | Denmark | Norway  | Sweden  | References |
|---------------------------------|---------|---------|---------|------------|
| <b>Direct medical costs (€)</b> |         |         |         |            |
| <b>Hospitalization</b>          |         |         |         |            |
| Bronchitis                      | 3156.92 | 3707.20 | 4588.14 |            |
| Pneumonia                       | 5386.09 | 5104.72 | 5893.72 |            |
| URTI                            | 3398.06 | 3439.89 | 3793.03 |            |
| Myocarditis                     | 2731.76 | 5104.72 | 5814.89 |            |
| Renal complications             | 5630.19 | 6959.50 | 7360.09 |            |
| CNS complications               | 2656.75 | 2976.86 | 3734.70 | [19-21]    |
| GI bleeding                     | 3903.47 | 4832.72 | 5765.58 |            |
| MI                              | 2668.18 | 7700.48 | 5814.89 |            |
| Stroke                          | 4940.09 | 7700.48 | 9000.28 |            |
| HF                              | 6429.13 | 6664.06 | 6321.69 |            |

| Parameter           | Denmark | Norway | Sweden | References |
|---------------------|---------|--------|--------|------------|
| Outpatient          |         |        |        |            |
| Bronchitis          | 297.78  | 253.24 | 404.46 |            |
| Pneumonia           | 360.18  | 342.33 | 527.92 |            |
| URTI                | 286.24  | 271.38 | 325.88 |            |
| Myocarditis         | 980.50  | 215.71 | 364.94 |            |
| Renal complications | 499.66  | 159.43 | 527.92 | [20-22]    |
| CNS complications   | 223.55  | 361.09 | 462.73 |            |
| GI bleeding         | 558.06  | 262.67 | 404.09 |            |
| MI                  | 980.50  | 178.19 | 423.58 |            |
| Stroke              | 980.50  | 182.90 | 430.13 |            |
| HF                  | 980.50  | 178.21 | 436.69 |            |

1 Euro = 10.18 NOK/ 7.44 DKK/ 10.68 SEK; CNS: Central nervous system; HF: Heart failure; IRCs: Influenza-related complications; MI: Myocardial infarction; URTI: Upper respiratory tract infection.

**Table S3.** Scenario analysis results (aQIV vs. SD-QIV) – Societal perspective.

| Scenario                                          | ICER (€/QALY) |        |          |
|---------------------------------------------------|---------------|--------|----------|
|                                                   | Denmark       | Norway | Sweden   |
| <i>Base case</i>                                  | 5472          | 7906   | 4856     |
| Scenario 1 (Vaccine coverage rates)               | 5472          | 7906   | 4856     |
| Scenario 2.1 (Strain distribution 2014/15)        | 4665          | 6912   | 4124     |
| Scenario 2.2 (Strain distribution 2015/16)        | 10,565        | 12,744 | 10,469   |
| Scenario 2.3 (Strain distribution 2016/17)        | 1576          | 3357   | 612      |
| Scenario 2.4 (Strain distribution 2017/18)        | 8254          | 9954   | 7253     |
| Scenario 2.5 (Strain distribution 2018/19)        | 5713          | 9813   | 5294     |
| Scenario 3 (aQIV rVE vs. SD-QIV at 13.9%)         | 18,183        | 23,326 | 19,055   |
| Scenario 4.1 (lower bound SD-QIV VE)              | 668           | 1819   | Dominant |
| Scenario 4.2 (upper bound SD-QIV VE)              | 12,470        | 17,005 | 12,755   |
| Scenario 5.1 (lower bound rVEs)                   | 41,221        | 51,276 | 44,790   |
| Scenario 5.2 (upper bound rVEs)                   | 386           | 1736   | Dominant |
| Scenario 6.1 (30% decrease in complication costs) | 6536          | 9123   | 6322     |
| Scenario 6.2 (30% increase in complication costs) | 4408          | 6688   | 3391     |
| Scenario 7 (exclude HF)                           | 7599          | 10,367 | 6,924    |

1 Euro = 10.18 NOK/ 7.44 DKK/ 10.68 SEK; aQIV: Adjuvanted quadrivalent influenza vaccine; HF: Heart failure; ICER: Incremental cost-effectiveness ratio; QALY: Quality adjusted life year; SD-QIV: Standard-dose quadrivalent influenza vaccine; rVE: Relative vaccine effectiveness; VE: Vaccine effectiveness.

**Table S4.** Scenario analysis results (aQIV vs. HD-QIV) – Healthcare payer perspective.

| Scenario                                   | NMB (€)   |           |            |
|--------------------------------------------|-----------|-----------|------------|
|                                            | Denmark   | Norway    | Sweden     |
| <i>Base case</i>                           | 8,531,060 | 5,614,985 | 10,249,405 |
| Scenario 1 (Vaccine coverage rates)        | 5,289,356 | 2,715,567 | 8,296,366  |
| Scenario 2.1 (Strain distribution 2014/15) | 8,421,393 | 5,551,396 | 10,058,734 |
| Scenario 2.2 (Strain distribution 2015/16) | 7,954,366 | 5,296,939 | 9,403,328  |
| Scenario 2.3 (Strain distribution 2016/17) | 8,886,945 | 5,825,479 | 10,740,354 |
| Scenario 2.4 (Strain distribution 2017/18) | 8,097,800 | 5,399,029 | 9,677,295  |
| Scenario 2.5 (Strain distribution 2018/19) | 8,309,844 | 5,405,009 | 9,898,486  |
| Scenario 3 (aQIV rVE vs. SD-QIV at 13.9%)  |           |           |            |
| Scenario 4.1 (lower bound SD-QIV VE)       | 9,084,353 | 6,000,392 | 11,070,082 |
| Scenario 4.2 (upper bound SD-QIV VE)       | 7,860,005 | 5,183,490 | 9,254,446  |

|                                                   |                            |                            |                            |
|---------------------------------------------------|----------------------------|----------------------------|----------------------------|
| Scenario 5.1 (lower bound rVEs)                   | 5,607,780 (Less effective) | 3,780,702 (Less effective) | 5,950,682 (Less effective) |
| Scenario 5.2 (upper bound rVEs)                   | 10,213,302                 | 6,677,630                  | 12,716,258                 |
| Scenario 6.1 (30% decrease in complication costs) | 8,289,451                  | 5,464,037                  | 9,870,187                  |
| Scenario 6.2 (30% increase in complication costs) | 8,378,688                  | 5,527,104                  | 10,041,092                 |
| Scenario 7 (exclude HF)                           | 8,152,054                  | 5,382,759                  | 9,703,936                  |

1 Euro = 10.18 NOK/ 7.44 DKK/ 10.68 SEK; aQIV: Adjuvanted quadrivalent influenza vaccine; HF: Heart failure; NMB: Net monetary benefit; SD-QIV: Standard-dose quadrivalent influenza vaccine; rVE: Relative vaccine effectiveness; VE: Vaccine effectiveness.

**Table S5.** Scenario analysis results (aQIV vs. HD-QIV) - Societal perspective.

| Scenario                                          | NMB (€)                    |                            |                            |
|---------------------------------------------------|----------------------------|----------------------------|----------------------------|
|                                                   | Denmark                    | Norway                     | Sweden                     |
| <i>Base case</i>                                  | 8,531,060                  | 5,614,985                  | 10,249,405                 |
| Scenario 1 (Vaccine coverage rates)               | 5,414,379                  | 2,774,574                  | 8,541,171                  |
| Scenario 2.1 (Strain distribution 2014/15)        | 8,630,568                  | 5,678,318                  | 10,367,103                 |
| Scenario 2.2 (Strain distribution 2015/16)        | 8,098,372                  | 5,389,642                  | 9,618,856                  |
| Scenario 2.3 (Strain distribution 2016/17)        | 9,161,083                  | 5,989,259                  | 11,145,276                 |
| Scenario 2.4 (Strain distribution 2017/18)        | 8,261,821                  | 5,505,460                  | 9,931,632                  |
| Scenario 2.5 (Strain distribution 2018/19)        | 8,503,454                  | 5,512,245                  | 10,184,155                 |
| Scenario 3 (aQIV rVE vs. SD-QIV at 13.9%)         | NA                         | NA                         | NA                         |
| Scenario 4.1 (lower bound SD-QIV VE)              | 9,386,038                  | 6,187,694                  | 11,521,712                 |
| Scenario 4.2 (upper bound SD-QIV VE)              | 7,990,845                  | 5,260,936                  | 9,448,884                  |
| Scenario 5.1 (lower bound rVEs)                   | 5,424,345 (Less effective) | 3,669,505 (Less effective) | 5,677,131 (Less effective) |
| Scenario 5.2 (upper bound rVEs)                   | 10,672,519                 | 6,956,005                  | 13,401,074                 |
| Scenario 6.1 (30% decrease in complication costs) | 8,486,442                  | 5,583,452                  | 10,163,952                 |
| Scenario 6.2 (30% increase in complication costs) | 8,575,678                  | 5,646,518                  | 10,334,857                 |
| Scenario 7 (exclude HF)                           | 8,325,347                  | 5,487,739                  | 9,962,027                  |

1 Euro = 10.18 NOK/ 7.44 DKK/ 10.68 SEK; aQIV: Adjuvanted quadrivalent influenza vaccine; HF: Heart failure; NMB: Net monetary benefit; SD-QIV: Standard-dose quadrivalent influenza vaccine; rVE: Relative vaccine effectiveness; VE: Vaccine effectiveness.

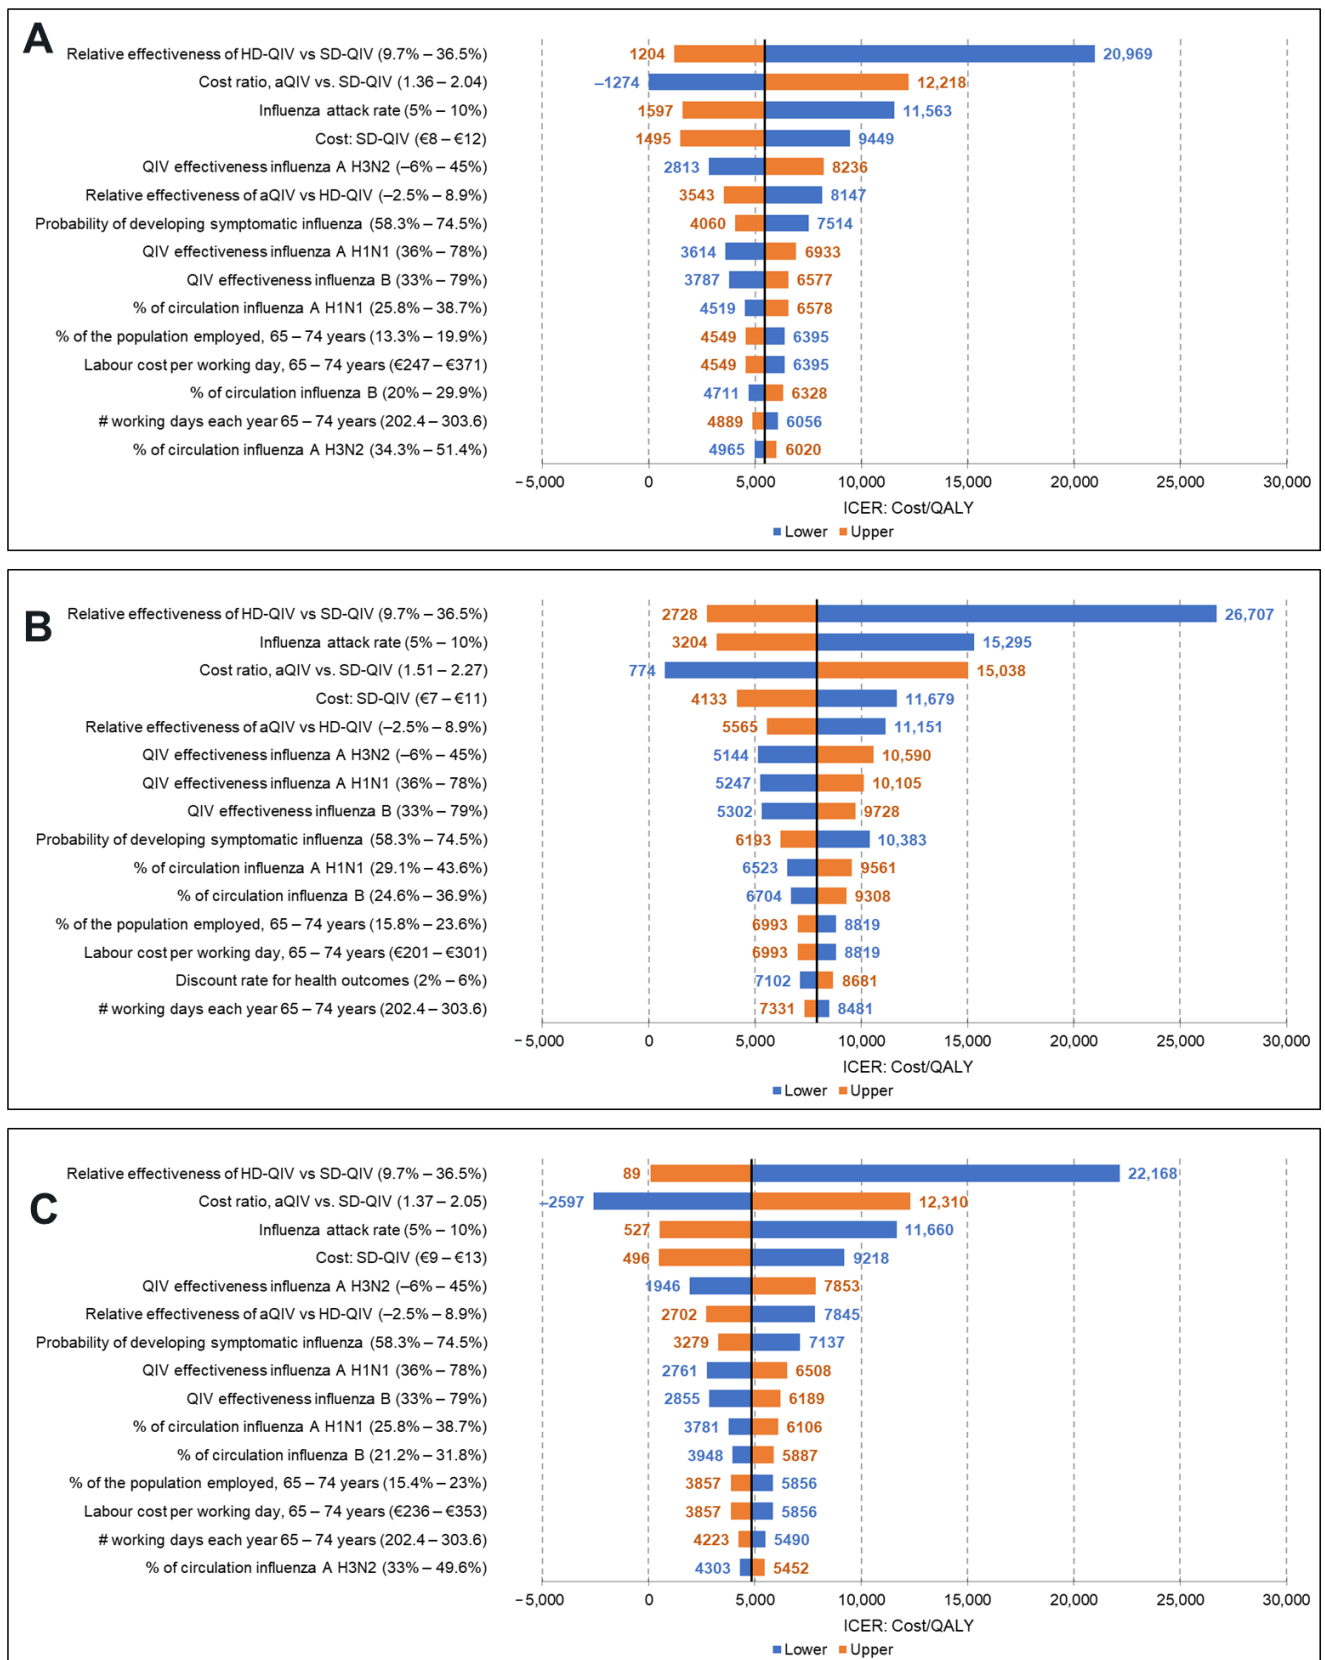

**Figure S1.** DSA results (aQIV vs. SD-QIV) – Societal perspective: (A) Denmark, (B) Norway, (C) Sweden.

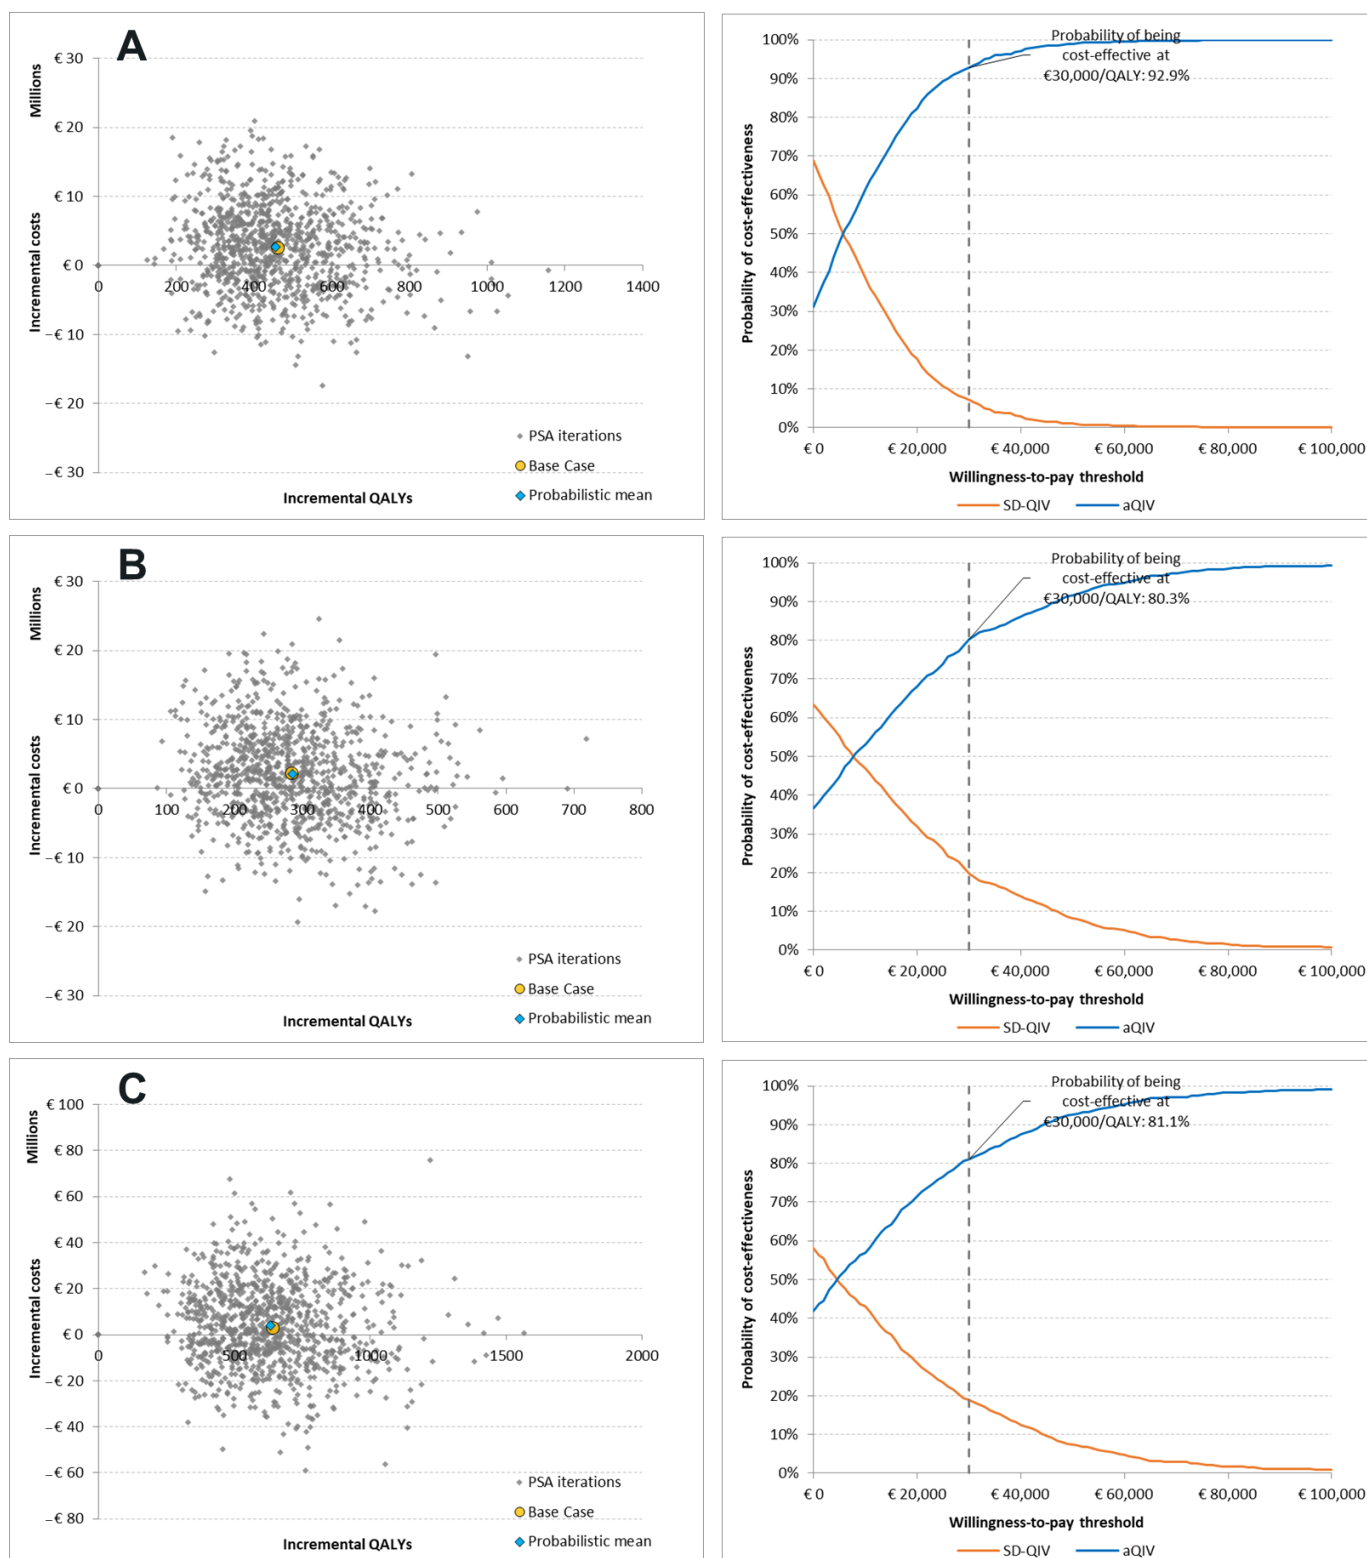

**Figure S2.** PSA results (aQIV vs. SD-QIV) – Societal perspective: (A) Denmark, (B) Norway, and (C) Sweden.

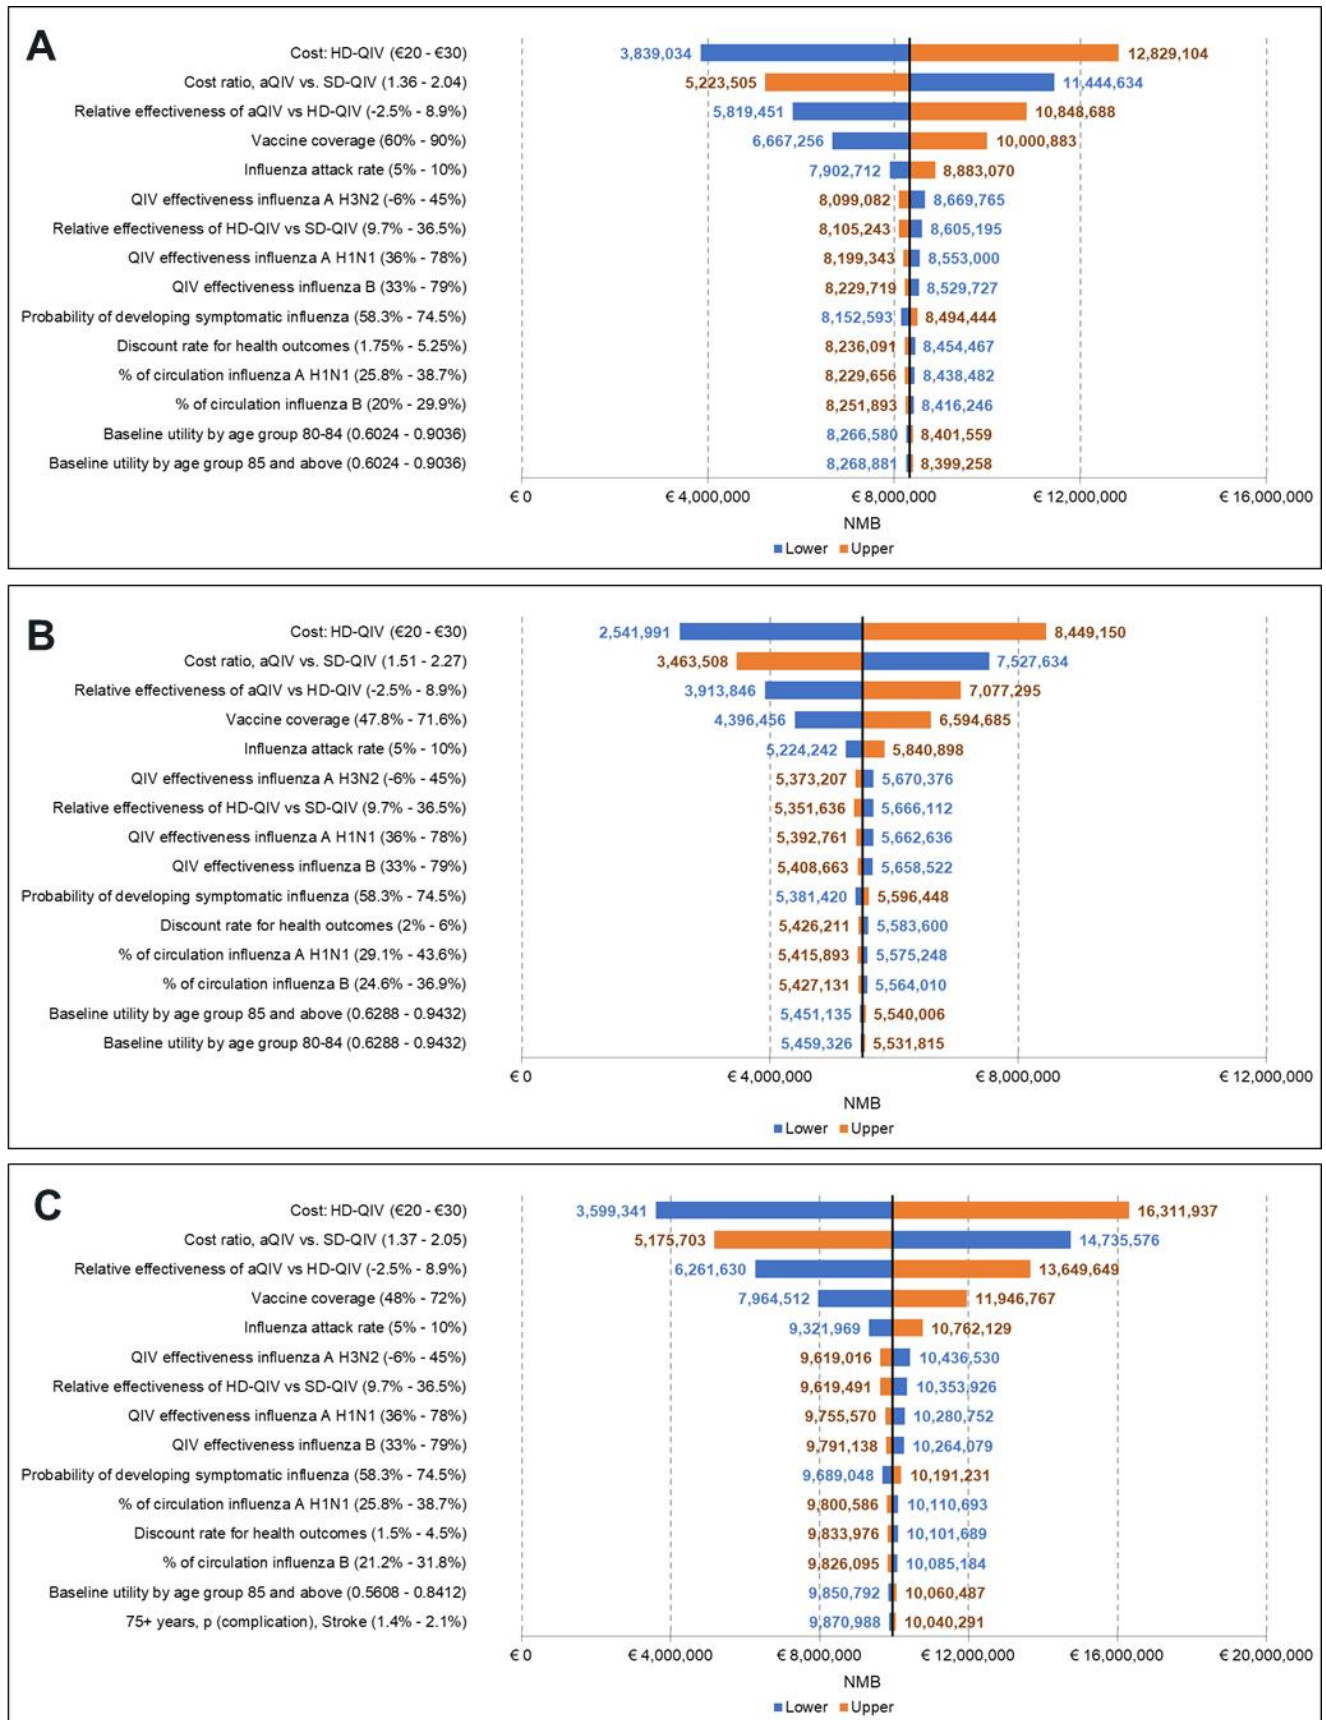

**Figure S3.** DSA results (aQIV vs. HD-QIV) – Healthcare payer perspective: (A) Denmark, (B) Norway, (C) Sweden.



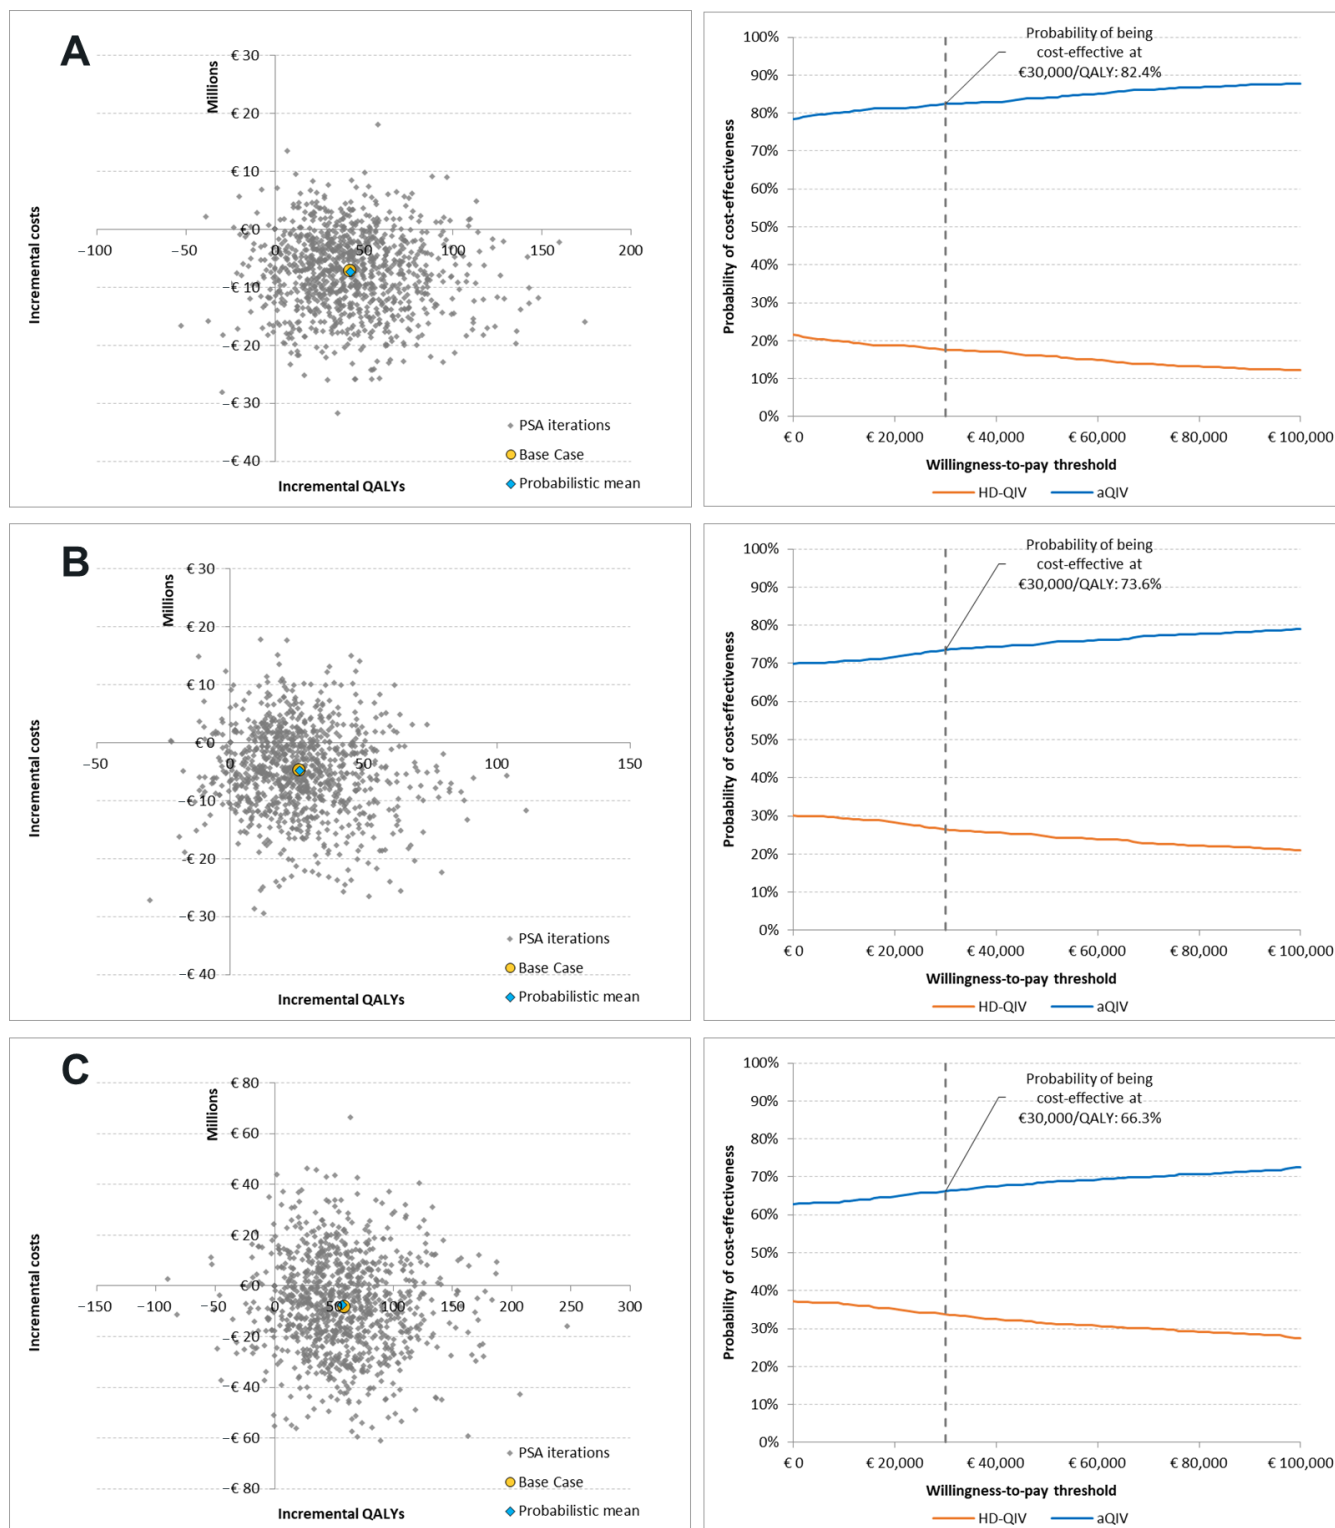

**Figure S4.** PSA results (aQIV vs. HD-QIV) – Healthcare payer perspective: (A) Denmark, (B) Norway, and (C) Sweden.

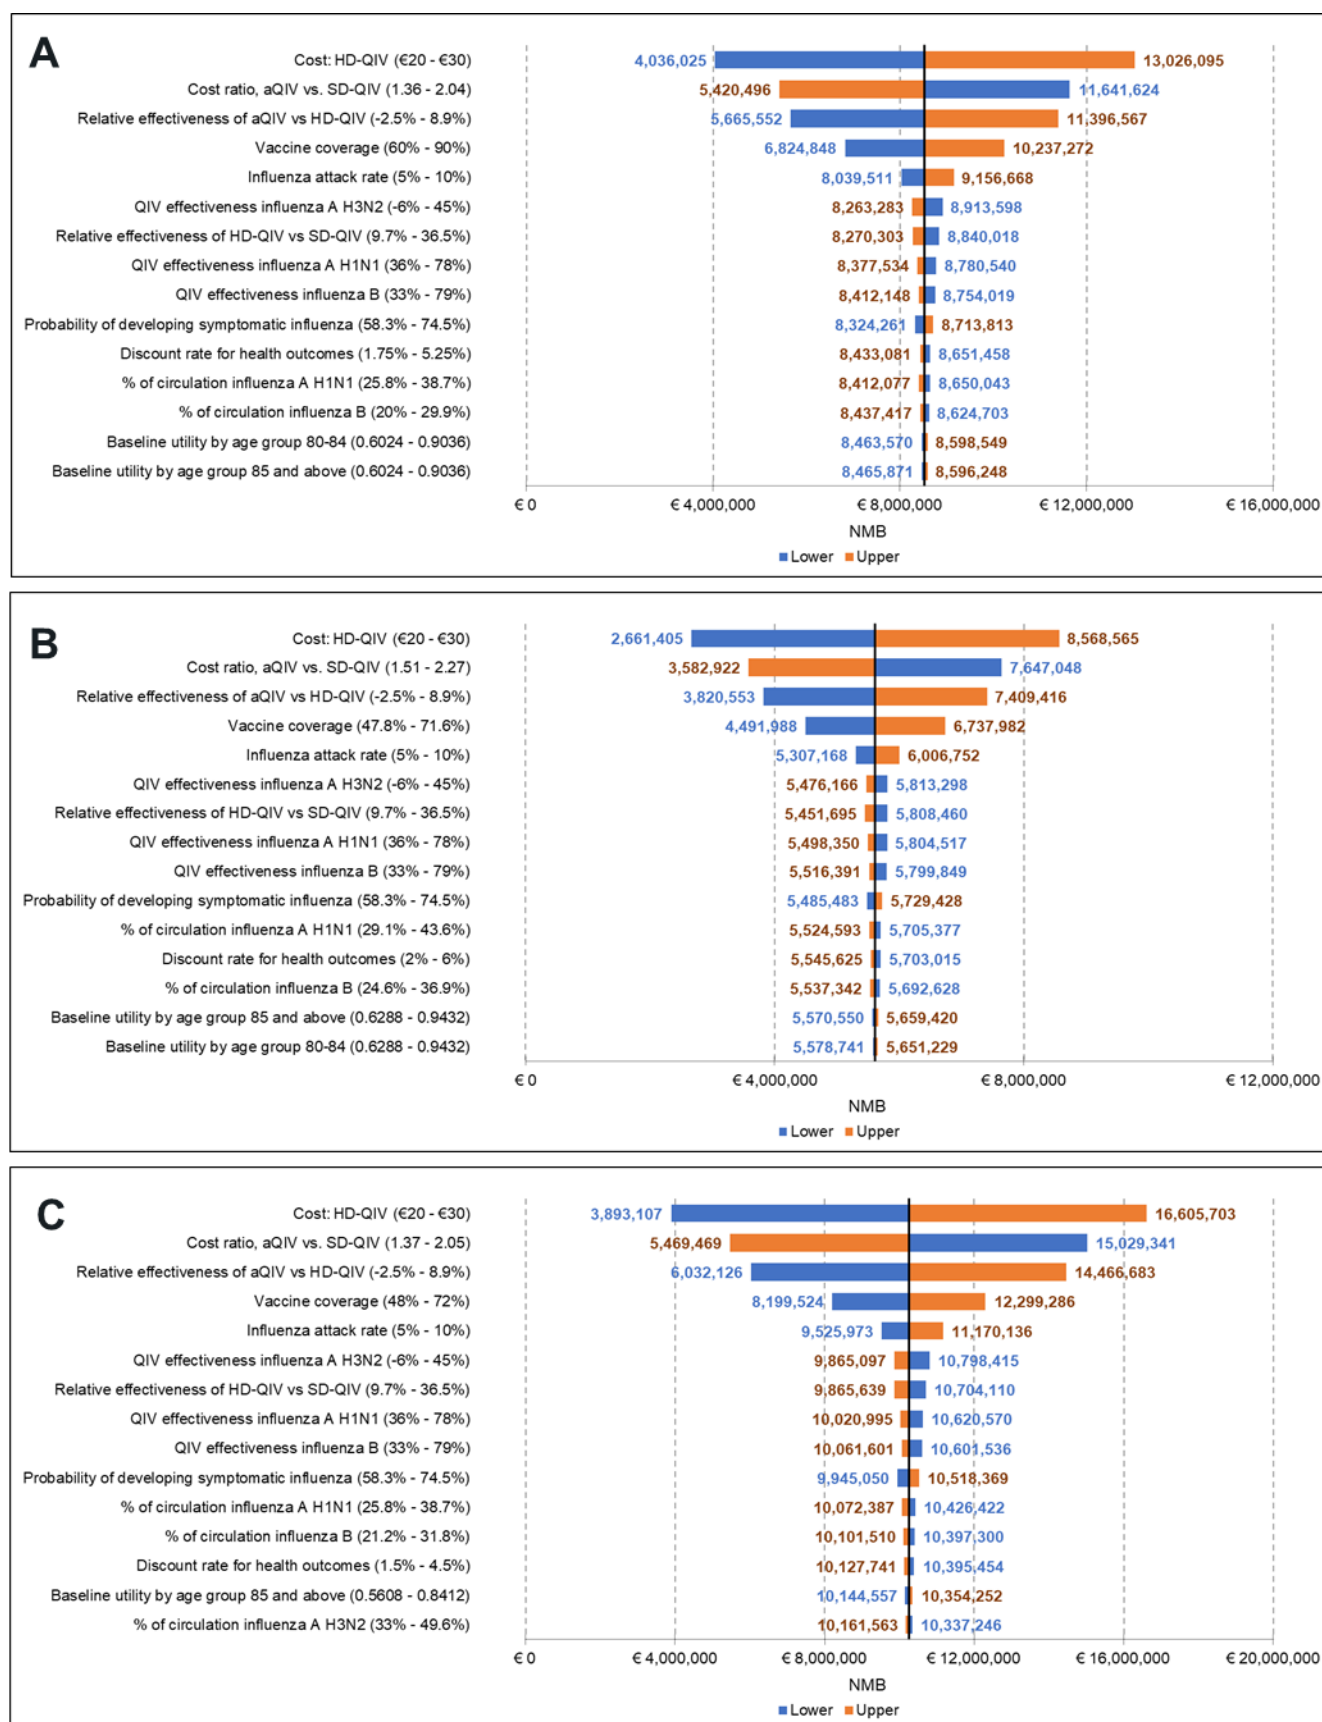

**Figure S5.** DSA results (aQIV vs. HD-QIV) – Societal perspective: (A) Denmark, (B) Norway, (C) Sweden.

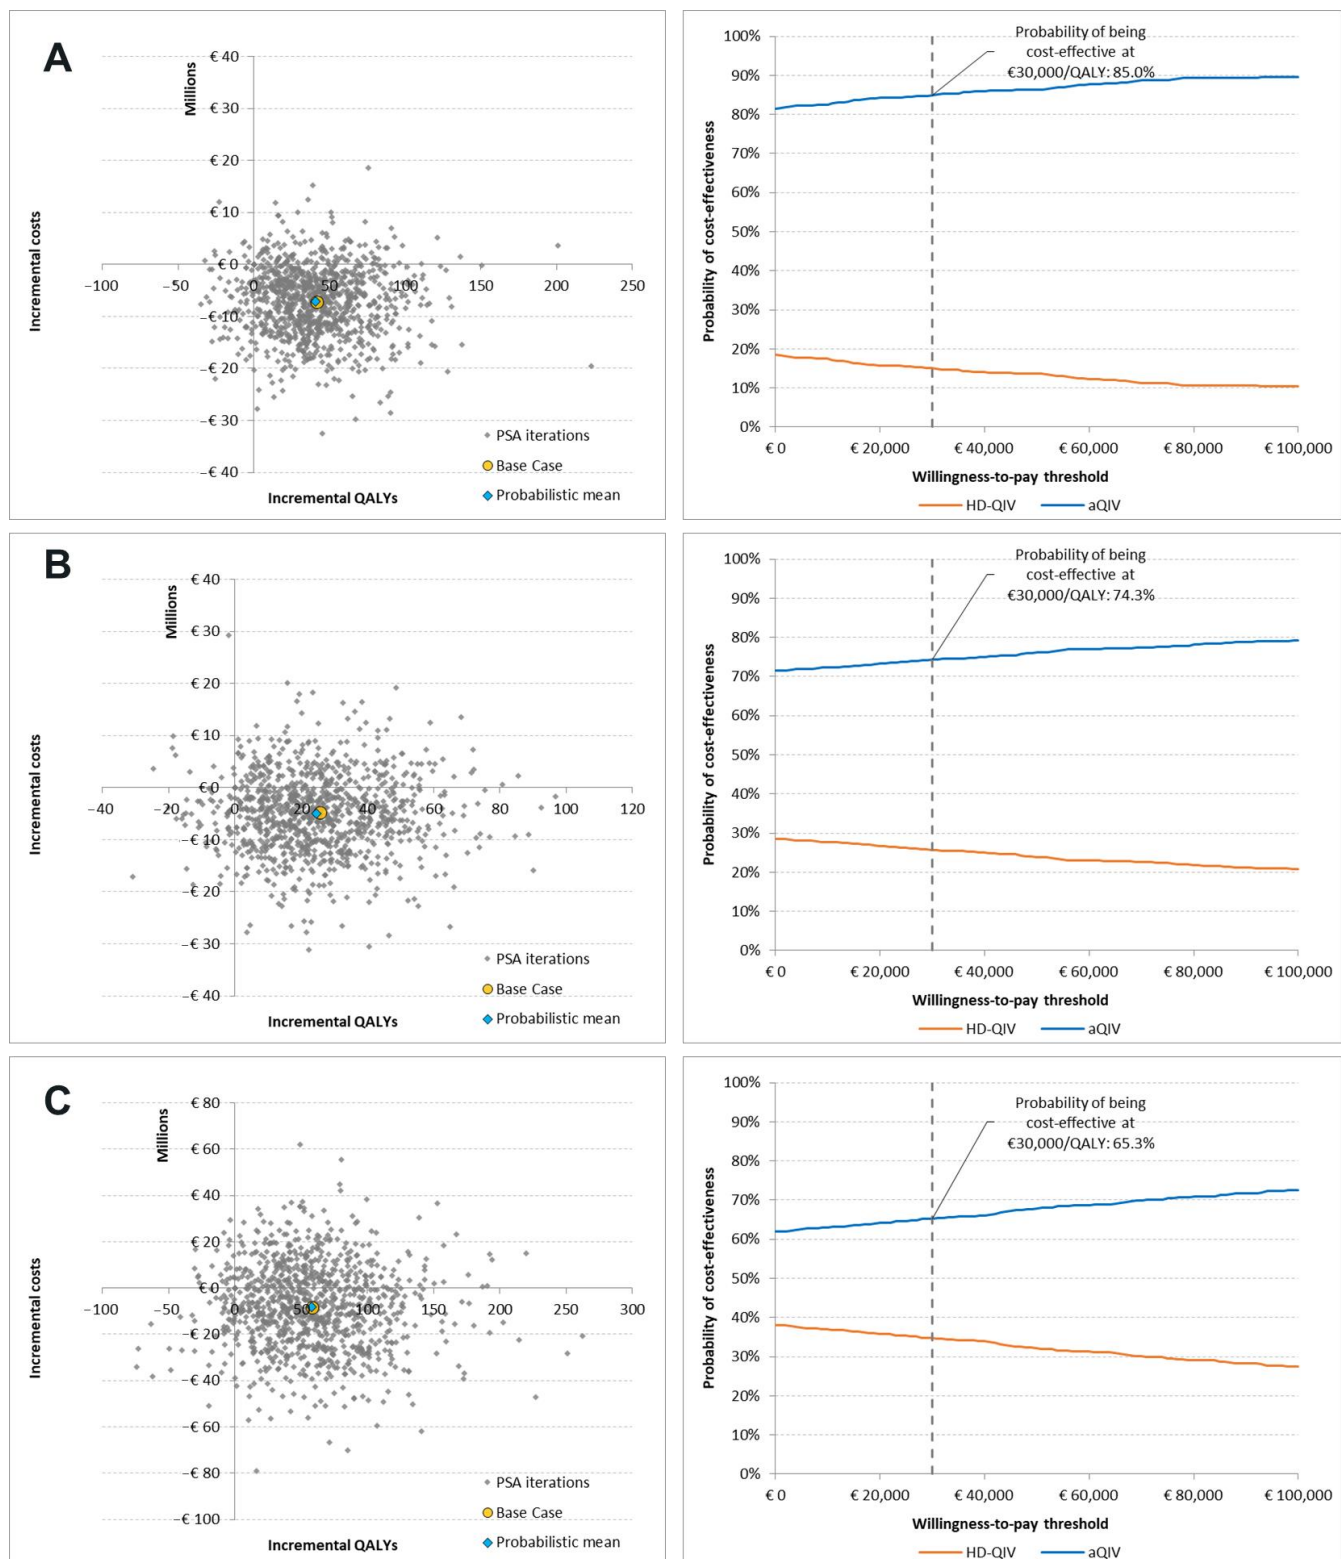

**Figure S6.** PSA results (aQIV vs. HD-QIV) – Societal perspective: (A) Denmark, (B) Norway, and (C) Sweden.

## References

1. Cai, R.; Gerlier, L.; Eichner, M.; Schwehm, M.; Rajaram, S.; Mould-Quevedo, J.; Lamotte, M. Cost-effectiveness of the cell-based quadrivalent versus the standard egg-based quadrivalent influenza vaccine in Germany. *J Med Econ* **2021**, *24*, 490-501, doi:10.1080/13696998.2021.1908000.
2. Boehme, A.K.; Luna, J.; Kulick, E.R.; Kamel, H.; Elkind, M.S.V. Influenza-like illness as a trigger for ischemic stroke. *Ann Clin Transl Neurol* **2018**, *5*, 456-463, doi:10.1002/acn3.545.

3. Truelsen, T.; Piechowski-Jozwiak, B.; Bonita, R.; Mathers, C.; Bogousslavsky, J.; Boysen, G. Stroke incidence and prevalence in Europe: a review of available data. *Eur J Neurol* **2006**, *13*, 581-598, doi:10.1111/j.1468-1331.2006.01138.x.
4. Michaelidis, C.I.; Kern, M.S.; Smith, K.J. Cost-effectiveness of decision support strategies in acute bronchitis. *J Gen Intern Med* **2015**, *30*, 1505-1510, doi:10.1007/s11606-015-3289-3.
5. Rozenbaum, M.H.; Mangen, M.J.; Huijts, S.M.; van der Werf, T.S.; Postma, M.J. Incidence, direct costs and duration of hospitalization of patients hospitalized with community acquired pneumonia: A nationwide retrospective claims database analysis. *Vaccine* **2015**, *33*, 3193-3199, doi:10.1016/j.vaccine.2015.05.001.
6. Longstreth, G.F.; Feitelberg, S.P. Outpatient care of selected patients with acute non-variceal upper gastrointestinal haemorrhage. *Lancet* **1995**, *345*, 108-111, doi:10.1016/s0140-6736(95)90068-3.
7. Verpillat, P.; Dorey, J.; Guilhaume-Goulant, C.; Dabbous, F.; Brunet, J.; Aballea, S. A chart review of management of ischemic stroke patients in Germany. *J Mark Access Health Policy* **2015**, *3*, doi:10.3402/jmahp.v3.24223.
8. Fu, M.; Kontogeorgos, S.; Thunstrom, E.; Zverkova Sandstrom, T.; Kroon, C.; Bollano, E.; Schaufelberger, M.; Rosengren, A. Trends in myocarditis incidence, complications and mortality in Sweden from 2000 to 2014. *Sci Rep* **2022**, *12*, 1810, doi:10.1038/s41598-022-05951-z.
9. Engstad, T.; Engstad, T.; Viitanen, M.; Ellekjær, H. Epidemiology of stroke in the elderly in the Nordic countries. Incidence, survival, prevalence and risk factors. *Norsk Epidemiologi* **2012**, *22*, 121-126, doi:10.5324/nje.v22i2.1557.
10. Jones, N.R.; Roalfe, A.K.; Adoki, I.; Hobbs, F.R.; Taylor, C.J. Survival of patients with chronic heart failure in the community: a systematic review and meta-analysis. *European journal of heart failure* **2019**, *21*, 1306-1325.
11. Accordini, S.; Corsico, A.G.; Calciano, L.; Bono, R.; Cerveri, I.; Fois, A.; Pirina, P.; Tassinari, R.; Verlato, G.; de Marco, R. The impact of asthma, chronic bronchitis and allergic rhinitis on all-cause hospitalizations and limitations in daily activities: a population-based observational study. *BMC Pulm Med* **2015**, *15*, 10, doi:10.1186/s12890-015-0008-0.
12. Tellioglu, E.; Balci, G.; Mertoglu, A. Duration of stay of patients with community-acquired pneumonia in influenza season. *Turk Thorac J* **2018**, *19*, 182-186, doi:10.5152/TurkThoracJ.2018.17108.
13. Debes, S.; Haug, J.B.; de Blasio, B.F.; Jonassen, C.M.; Dudman, S.G. Etiology of viral respiratory tract infections in hospitalized adults, and evidence of the high frequency of prehospitalization antibiotic treatment in Norway. *Health Sci Rep* **2021**, *4*, e403, doi:10.1002/hsr2.403.
14. Kotseva, K.; Gerlier, L.; Sidelnikov, E.; Kutikova, L.; Lamotte, M.; Amarenco, P.; Annemans, L. Patient and caregiver productivity loss and indirect costs associated with cardiovascular events in Europe. *Eur J Prev Cardiol* **2019**, *26*, 1150-1157, doi:10.1177/2047487319834770.
15. Turchetti, G.; Bellelli, S.; Amato, M.; Bianchi, S.; Conti, P.; Cupisti, A.; Panichi, V.; Rosati, A.; Pizzarelli, F.; On Behalf of the Tuscany, C.K.D.S.G. The social cost of chronic kidney disease in Italy. *Eur J Health Econ* **2017**, *18*, 847-858, doi:10.1007/s10198-016-0830-1.
16. Strzelczyk, A.; Knake, S.; Oertel, W.H.; Rosenow, F.; Hamer, H.M. Inpatient treatment costs of status epilepticus in adults in Germany. *Seizure* **2013**, *22*, 882-885, doi:10.1016/j.seizure.2013.08.003.
17. Button, L.A.; Roberts, S.E.; Evans, P.A.; Goldacre, M.J.; Akbari, A.; Dsilva, R.; Macey, S.; Williams, J.G. Hospitalized incidence and case fatality for upper gastrointestinal bleeding from 1999 to 2007: a record linkage study. *Aliment Pharmacol Ther* **2011**, *33*, 64-76, doi:10.1111/j.1365-2036.2010.04495.x.
18. Stendardo, M.; Bonci, M.; Casillo, V.; Miglio, R.; Giovannini, G.; Nardini, M.; Campo, G.; Fucili, A.; Boschetto, P. Predicting return to work after acute myocardial infarction: Socio-occupational factors overcome clinical conditions. *PLoS One* **2018**, *13*, e0208842, doi:10.1371/journal.pone.0208842.
19. The Danish Health Data Authority. DRG rates 2022. Available online: <https://sundhedsdatastyrelsen.dk/da/afregning-og-finansiering/takster-drg/takster-2022> (accessed on 31 October 2022).
20. The Norwegian Directorate of Health. Effort-driven financing (ISF) – Regulations 2022. Available online: <https://www.helsedirektoratet.no/tema/finansiering/innsatsstyrte-finansiering-og-drg-systemet/innsatsstyrte-finansiering-isf> (accessed on 31 October 2022).
21. Sweden Southern healthcare region. Regional prices and allowances. Available online: <https://sodrasjukvardsregionen.se/download/regionala-priser-och-ersattningar-for-sodra-sjukvardsregionen-2022/?wpdmdl=24791&masterkey=61decc148fc78> (accessed on 15 November 2022).
22. The Danish Health Data Authority. DRG rates 2017: outpatient day rates Available online: <https://sundhedsdatastyrelsen.dk/da/afregning-og-finansiering/takster-drg/takster-2017> (accessed on 31 October 2022).
